# Supplementary material for: Sinusoidal Injury and Portal Hypertension after Hepatectomy for Colorectal Liver Metastases: Predictors, Risk Stratification, and Clinical Outcomes
Source: Research Square preprint supplement (doi:10.21203/rs.3.rs-8196994/v1), 2025-12-11
Supplement: Supplementary file 1 [file 887a377e38d5c052e43c2262.xlsx]

## Sheet: Hoja1
Risk calculator to predict the probability to develop grade 2–3 SOS and ePHT
	Num CHT cycles1	AcMo2	PORTAL EMBOLIZATION-LIGATION3		1Number of cycles of chemotherapy (CHT)
x	4	1	0		2Monoclonal antibody (AcMo): 0=EGFR inhibitor; 1=VEGF inhibitor
COEFFICIENT	0.082	-1.54	1.036		3Portal Embolization or ligation: 0=NO; 1=YES
CONSTANT	-1.621
PROBABILITY TO SOS4			0.0555668
		P SOS (G2-3)4	TYPE LIVER SURGERY5		4Probability to Sinusoidal Obstruction Syndrome (SOS) G2-3
x		0.0555668	1		5Type of liver Surgery: 0=minor hepatectomy; 1=major hepatectomy
COEFFICIENT		3.709	2.052		6Probability to Early Portal Hypertension
CONSTANT		-3.585
PROBABILITY TO ePHT6			0.209672
